# Supplementary material for: Concentration-dependent photothermal conversion efficiency of gold nanoparticles under near-infrared laser and broadband irradiation
Source: publisher site journal article supplement (doi:10.3762/bjnano.14.20), 2023-02-06
Supplement: Additional file 1 [file 2190-4286-14-20-S1.pdf]

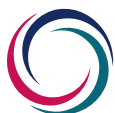

## Supporting Information

for

### **Concentration-dependent photothermal conversion efficiency of gold nanoparticles under near-infrared laser and broadband irradiation**

Vikas, Raj Kumar and Sanjeev Soni

*Beilstein J. Nanotechnol.* **2023**, *14*, 205–217. [doi:10.3762/bjnano.14.20](https://doi.org/10.3762/bjnano.14.20)

## Additional experimental data

**Table S1:** Different GNPs used in this study.

| <b>GNPs type</b>      | <b>Size (nm)</b> | <b>Peak absorption wavelength (nm)</b> | <b>Standard Concentration (<math>\mu\text{g/ml}</math>)</b> | <b>Product no.</b>       | <b>Procured from</b> |
|-----------------------|------------------|----------------------------------------|-------------------------------------------------------------|--------------------------|----------------------|
| Gold nanosphere (GNS) | 40               | 529–533                                | 45                                                          | 741981                   | Sigma Aldrich, USA   |
| Gold nanorods (GNR)   | 25×47            | 600                                    | 45                                                          | 771651                   | Sigma Aldrich, USA   |
| GNR                   | 10×38            | 790                                    | 38.5                                                        | A12-10-780-CTAB-DIH-1-25 | Nanopartz, USA       |
| GNR                   | 10×41            | 806                                    | 39                                                          | A12-10-808-CTAB-DIH-1-25 | Nanopartz, USA       |

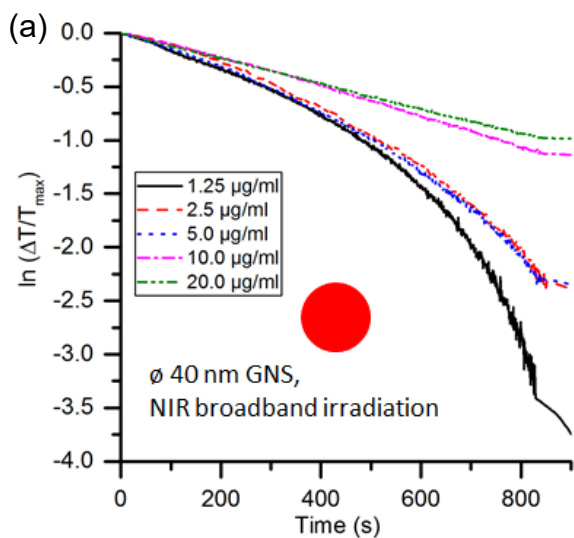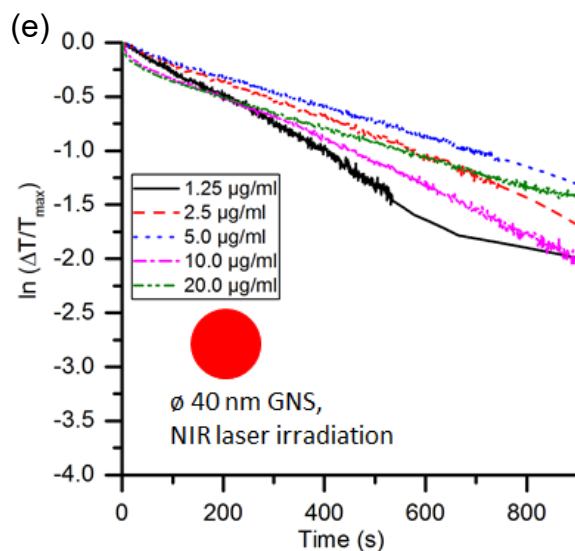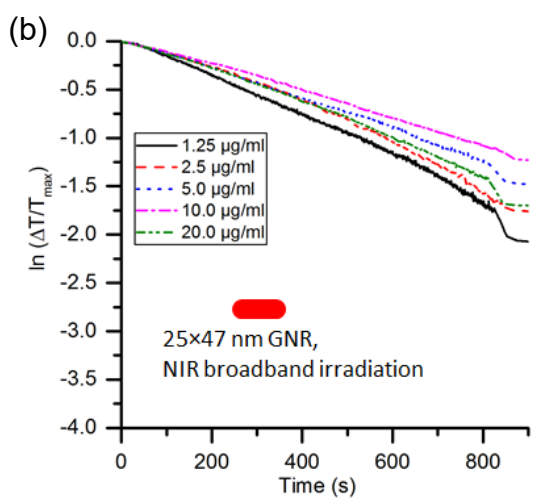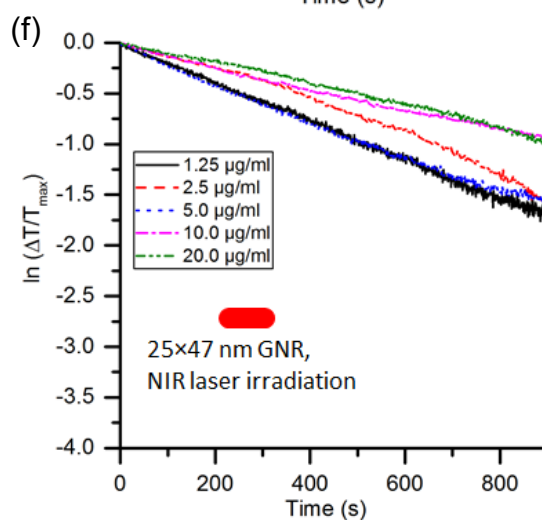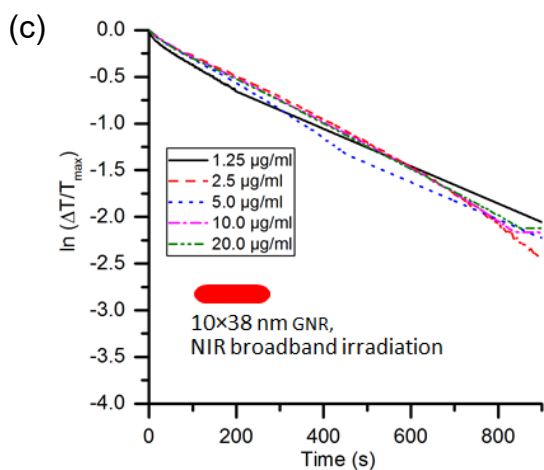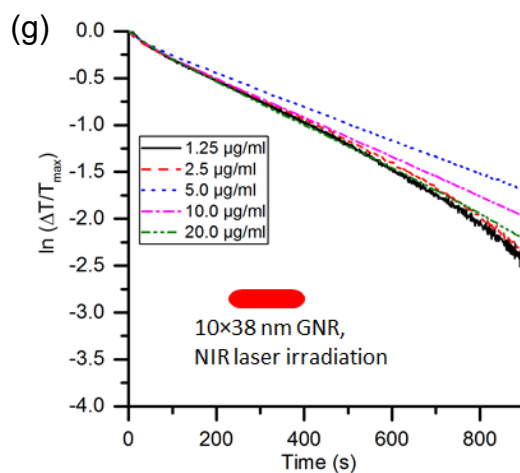

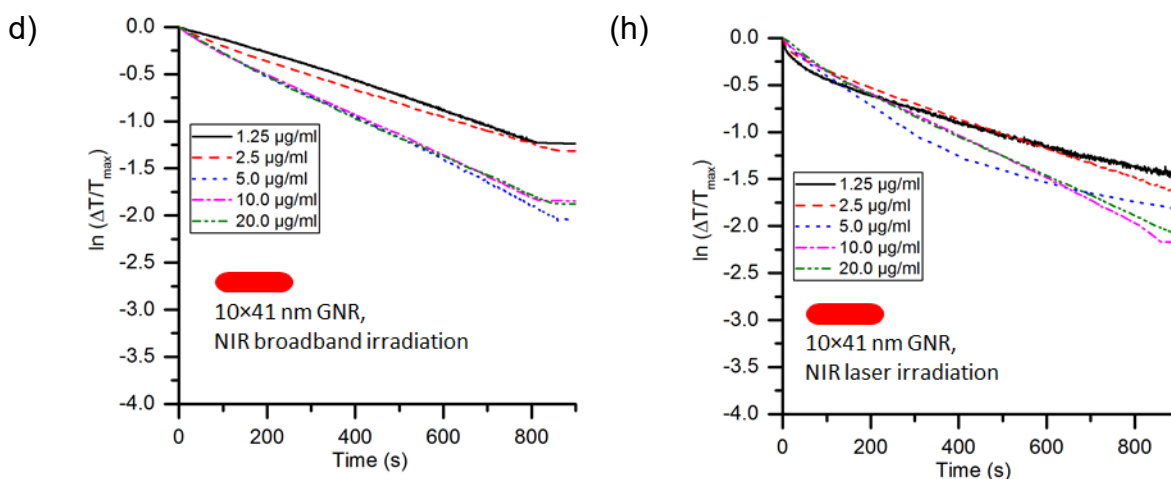

**Figure S1:** Temporal variation of  $\ln(\Delta T/T_{\max})$  for calculating the rate constant of heat loss of different nanoparticle concentrations for (a) 40 nm GNSs, (b)  $25 \times 47$  nm GNRs, (c)  $10 \times 38$  nm GNRs, and (d)  $10 \times 41$  nm GNRs under NIR broadband irradiation (754–816 nm), and (e) 40 nm GNSs, (f)  $25 \times 47$  nm GNRs, (g)  $10 \times 38$  nm GNRs, and (h)  $10 \times 41$  nm GNRs under NIR laser irradiation (808 nm).

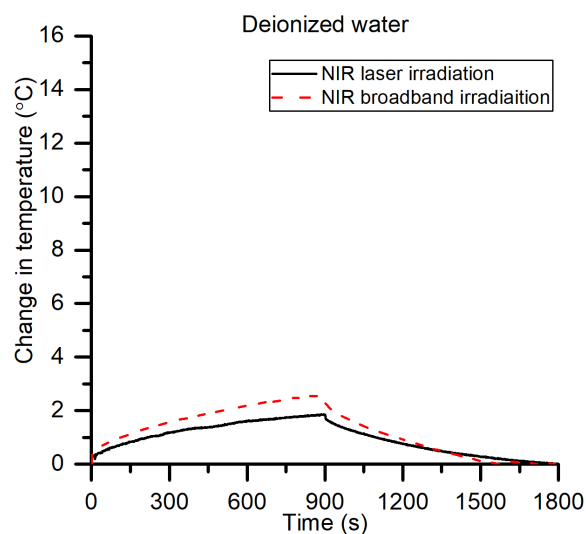

**Figure S2:** Heating and cooling profiles of deionized water under NIR broadband and NIR laser irradiation.

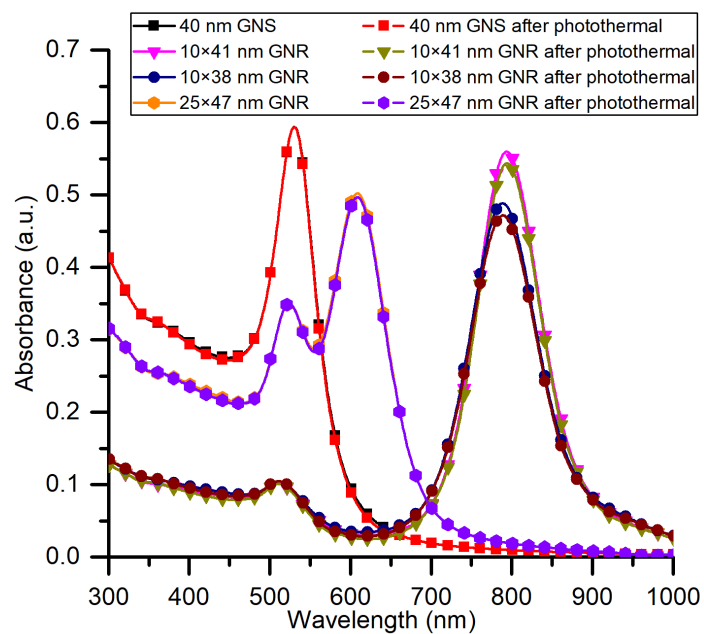

**Figure S3:** Spectral absorbance, measured using a spectrophotometer, of (a) 40 nm GNSs, (b) 25 × 47 nm GNRs, (c) 10 × 38 nm GNRs, and (d) 10 × 41 nm GNRs before and after irradiation.
